# Supplementary material for: Modulation of Viral Programmed Ribosomal Frameshifting and Stop Codon Readthrough by the Host Restriction Factor Shiftless
Source: MDPI journal article supplement (doi:10.3390/v13071230), 2021-06-25
Supplement: s1 [file s1]

## Supplementary Material

### A

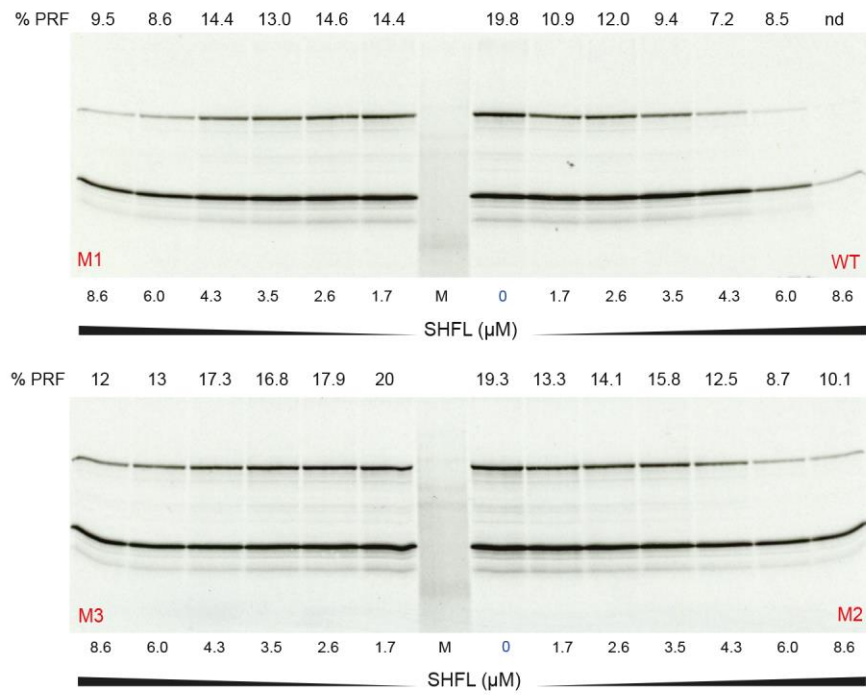

### B

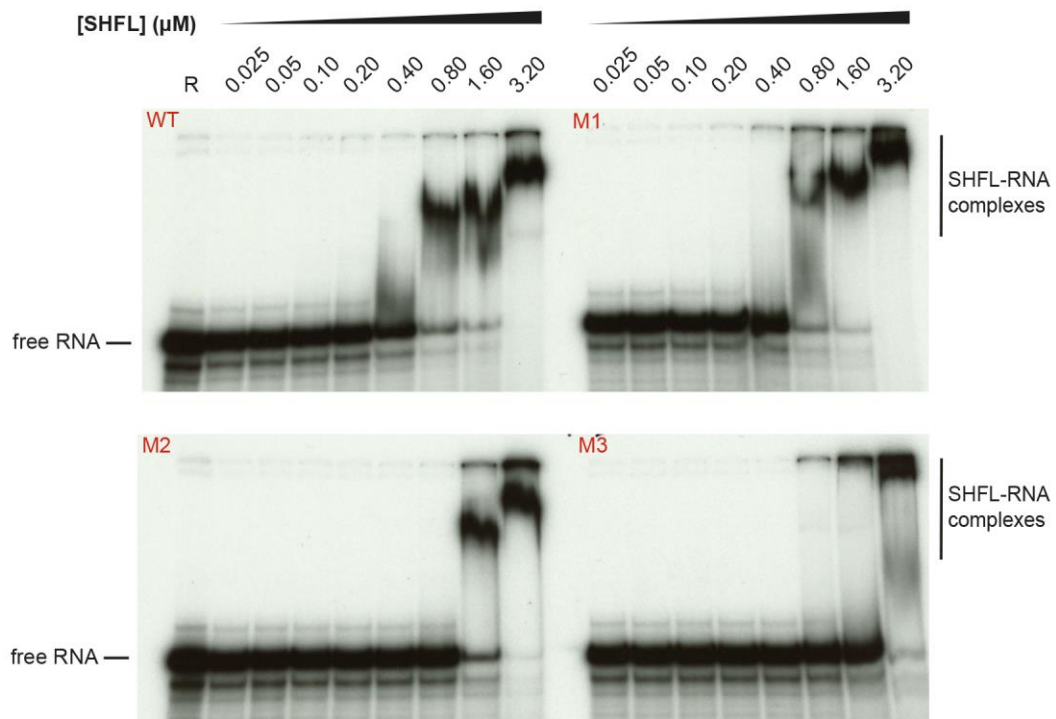

**Figure S1:** Original gels of Figure 6

**Table S1:** Intensities for stop and recoded species from Figure 3.**HIV-1**

| [SHFL] $\mu\text{M}$ | stop product (10) | PRF product (18) | % PRF |
|----------------------|-------------------|------------------|-------|
| 0                    | 84090             | 7355             | 4.5   |
| 1.7                  | 81623             | 7338             | 4.6   |
| 2.6                  | 76216             | 7021             | 4.7   |
| 3.4                  | 77796             | 6422             | 4.2   |
| 5.2                  | 71023             | 4578             | 3.4   |
| 6.9                  | 32171             | 1486             | 2.5   |
| 8.6                  | 14226             | 849              | 3.1   |

**SARS-CoV-1**

| [SHFL] $\mu\text{M}$ | stop product (10) | PRF product (18) | % PRF |
|----------------------|-------------------|------------------|-------|
| 0                    | 67112             | 36823            | 19.7  |
| 1.7                  | 91128             | 25846            | 12.3  |
| 2.6                  | 75614             | 20952            | 12.1  |
| 3.4                  | 88379             | 22919            | 11.4  |
| 5.2                  | 83669             | 15454            | 8.7   |
| 6.9                  | 94661             | 12804            | 6.6   |
| 8.6                  | 68457             | 8091             | 5.7   |

**IBV**

| [SHFL] $\mu\text{M}$ | stop product (10) | PRF product (19) | % PRF |
|----------------------|-------------------|------------------|-------|
| 0                    | 44514             | 30511            | 21.4  |
| 0.35                 | 51022             | 26122            | 17.8  |
| 0.7                  | 49601             | 23432            | 16.9  |
| 1.0                  | 46998             | 22755            | 17.2  |
| 2.1                  | 44298             | 15767            | 13.8  |
| 2.8                  | 39711             | 13247            | 13.2  |
| 3.4                  | 33470             | 10366            | 12.5  |
| 5.2                  | 32886             | 9985             | 12.2  |
| 6.9                  | 18763             | 5948             | 13.3  |

**EMCV**

| [SHFL] $\mu\text{M}$ | stop product (9) | PRF product (19) | % PRF |
|----------------------|------------------|------------------|-------|
| 0                    | 28378            | 24472            | 21.9  |
| 0.9                  | 33793            | 19494            | 17.3  |
| 1.7                  | 34213            | 10909            | 11.5  |
| 2.6                  | 34019            | 8163             | 9.2   |
| 3.5                  | 31800            | 5992             | 7.5   |
| 4.3                  | 26266            | 5126             | 7.7   |
| 5.2                  | 16916            | 3691             | 8.5   |
| 6.0                  | 16310            | 4458             | 11.3  |
| 6.9                  | 10213            | 1888             | 7.4   |
| 10.3                 | 6659             | 1769             | 9.9   |

**TMEV**

| [SHFL] $\mu\text{M}$    | stop product (10) | PRF product (19) | % PRF |
|-------------------------|-------------------|------------------|-------|
| 0                       | 1176              | 10119            | 47.2  |
| 0.8                     | 3958              | 7028             | 32.4  |
| 1.6                     | 5013              | 4421             | 24.7  |
| 3.2                     | 9984              | 3066             | 12.4  |
|                         |                   |                  |       |
| [SHFL M1] $\mu\text{M}$ | stop product (10) | PRF product (19) | % PRF |
| 0                       | 2877              | 21842            | 46.5  |

|     |      |       |      |
|-----|------|-------|------|
| 0.8 | 3012 | 27856 | 47.5 |
| 1.6 | 3687 | 23122 | 45.4 |
| 3.2 | 3792 | 20154 | 44.3 |

#### MuLV

| <i>[SHFL] <math>\mu</math>M</i> | <i>stop product (10)</i> | <i>RT product (14)</i> | <i>% RT</i> |
|---------------------------------|--------------------------|------------------------|-------------|
| 0                               | 14291                    | 6738                   | 22.8        |
| 0.35                            | 11075                    | 6339                   | 26.0        |
| 0.7                             | 13664                    | 8652                   | 27.7        |
| 1.0                             | 13807                    | 7323                   | 24.8        |
| 1.4                             | 15566                    | 5153                   | 17.8        |
| 2.1                             | 13081                    | 3512                   | 15.1        |
| 2.8                             | 14671                    | 4177                   | 15.8        |
| 3.4                             | 15450                    | 3433                   | 13.0        |
| 5.2                             | 10763                    | 2045                   | 11.4        |
| 6.9                             | 9592                     | 1317                   | 8.6         |
| 8.6                             | 8963                     | 862                    | 6.2         |

Phosphorimager values for the gels of Figure 3. Numbers in brackets indicate the number of methionines in the stop and recoded products.
